# Supplementary material
Source: publisher site journal article supplement (https://www.dovepress.com/article/229236)
Supplement: Supplementary file 1 [file get_supplementary_file.php]

Figure S1. The patient selection flow table.

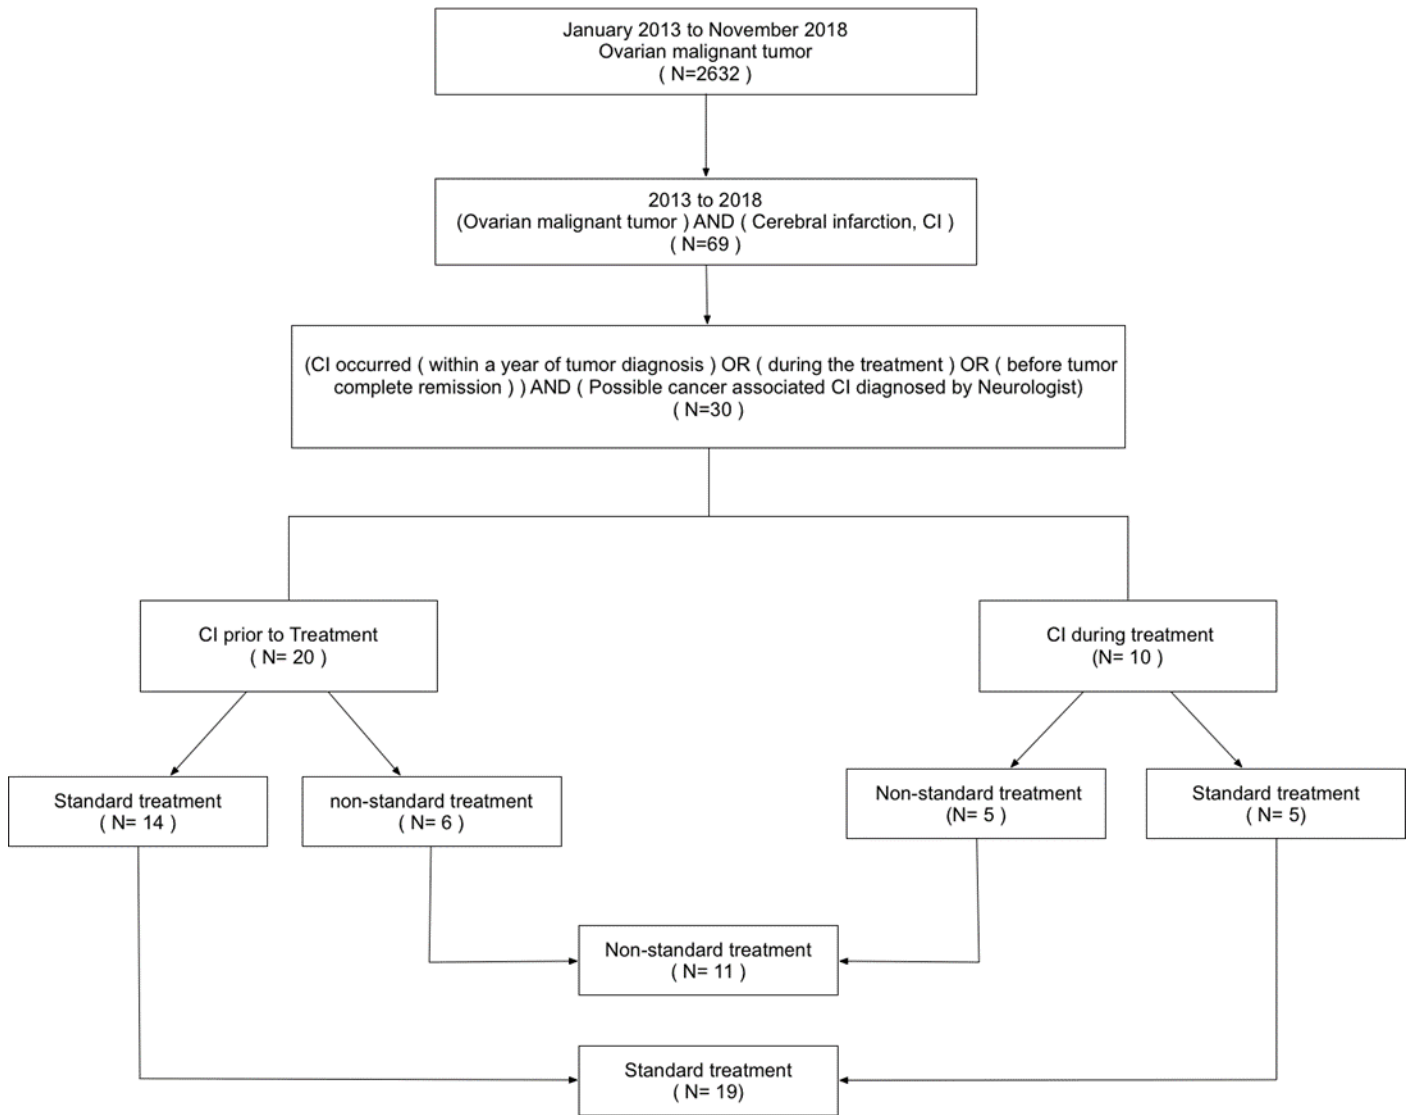

**Table S1.** The treatment and outcomes of ovarian cancer patients with cancer-associated cerebral infarction.

**Abbreviations:** CI, cerebral infarction; ECOG-PS, Eastern Cooperative Oncology Group performance score; FIGO, International Federation of Gynecology and Obstetrics; CRS, cytoreductive surgery; IDS, interval debulking surgery; BSO, bilateral salpingo-oophorectomy; LAP, laparoscopy; TC, paclitaxel/carboplatin; TP, paclitaxel/cisplatin; C, carboplatin; 5-Fu, 5-Fluorouracil; IP, intraperitoneal; R0, complete cytoreduction; OS, overall survival; m, months.

| C<br>A<br>S<br>E | Age<br>(years) | CI                                                                            |                                       |             |                                                   |               | CA125<br>before<br>initial<br>treatment<br>(U/mL) | Surgery | Neoadju<br>vant<br>chemo<br>(cycles<br>of<br>chemo,<br>regimen) | Adjuvant<br>chemo<br>(cycles of<br>chemo,<br>regimen) | FIG<br>O<br>Sta<br>ge | R0(0,<br>no; 1,<br>yes) | Standar<br>d<br>treatme<br>nt<br>(0, no;<br>1, yes) | Deat<br>h<br>(0,<br>no;<br>1,yes<br>) | OS<br>(m) |
|------------------|----------------|-------------------------------------------------------------------------------|---------------------------------------|-------------|---------------------------------------------------|---------------|---------------------------------------------------|---------|-----------------------------------------------------------------|-------------------------------------------------------|-----------------------|-------------------------|-----------------------------------------------------|---------------------------------------|-----------|
|                  |                | Time of<br>CI<br>(before<br>treatme<br>nt, 0;<br>during<br>treatme<br>nt, 1 ) | Chief complaint<br>at onset           | ECO<br>G-PS | D-<br>dimer<br>(mg/L)<br>(Norma<br>l, 0-<br>0.55) | CI<br>lesions |                                                   |         |                                                                 |                                                       |                       |                         |                                                     |                                       |           |
| 1                | 77             | 1                                                                             | Unknown                               | 1-2         | 2.50                                              | Single        | 1000                                              | IDS     | 20,<br>unknow<br>n                                              | 1, TC                                                 | IVB                   | 0                       | 0                                                   | 1                                     | 18        |
| 2                | 72             | 0                                                                             | Unknown                               | 1-2         | Unkno<br>wn                                       | Single        | 10681                                             | IDS     | 2, TC                                                           | 2, TC                                                 | IIIC                  | 1                       | 0                                                   | 0                                     | 24        |
| 3                | 61             | 1                                                                             | Hemiplegia                            | 3-4         | 15.00                                             | Multiple      | 11445                                             | IDS     | 2, TC                                                           | 8, TC                                                 | IIIC                  | 0                       | 1                                                   | 1                                     | 12        |
| 4                | 61             | 0                                                                             | Gait disturbance                      | 1-2         | 2.40                                              | Single        | 118                                               | IDS     | 1, TC                                                           | 7, TC                                                 | IIIC                  | 1                       | 1                                                   | 0                                     | 11        |
| 5                | 58             | 0                                                                             | Unknown                               | 1-2         | 3.18                                              | Multiple      | 12.63                                             | CRS     | 0                                                               | 4, TC                                                 | IC                    | 1                       | 1                                                   | 0                                     | 49        |
| 6                | 37             | 1                                                                             | Dysarthria;<br>dizziness;<br>vomiting | 3-4         | 18.1                                              | Multiple      | 1209                                              | LAP     | 2, TC                                                           | 0                                                     | IIIC                  | 0                       | 0                                                   | 1                                     | 13        |
| 7                | 75             | 0                                                                             |                                       | 1-2         | 0.87                                              | mono          | 126.2                                             | CRS     | 0                                                               | 6, 1TC and<br>5C                                      | IIB                   | 1                       | 1                                                   | 0                                     | 50        |

|    |    |   |                                                  |     |             |          |       |                     |       |       |      |   |   |   |    |
|----|----|---|--------------------------------------------------|-----|-------------|----------|-------|---------------------|-------|-------|------|---|---|---|----|
| 8  | 53 | 0 | Dizziness                                        | 3-4 | 5.44        | Multiple | 1353  | CRS                 | 0     | 6, TC | IC   | 1 | 1 | 0 | 18 |
| 9  | 73 | 0 | Unknown                                          | 1-2 | 1.78        | Multiple | 1574  | IDS                 | 3, TC | 8, TC | IIIC | 0 | 1 | 1 | 28 |
| 10 | 46 | 0 | Dysarthria;                                      | 3-4 | 42.75       | Multiple | 1841  | LAP                 | 0     | 0     | IVB  | 0 | 0 | 1 | 7  |
| 11 | 68 | 0 | Dizziness;<br>Transient loss of<br>consciousness | 1-2 | 4.23        | Multiple | 1953  | IDS                 | 3, TC | 6, TC | IIIC | 1 | 1 | 1 | 22 |
| 12 | 75 | 1 | Dizziness;<br>Hemiplegia                         | 3-4 | 1.80        | Multiple | 198.4 | CRS                 | 0     | 1, TC | II   | 1 | 0 | 1 | 39 |
| 13 | 46 | 1 | Lack of<br>alertness;<br>Dizziness;              | 3-4 | 16.93       | Multiple | 2080  | IDS                 | 3, TC | 1, TC | IIIC | 1 | 0 | 1 | 17 |
| 14 | 52 | 1 | Dizziness                                        | 1-2 | 12.59       | Multiple | 2201  | CRS                 | 0     | 6, TC | IIIB | 1 | 1 | 0 | 21 |
| 15 | 46 | 1 | Dysarthria;<br>Hemiplegia                        | 3-4 | 14.90       | Multiple | 2273  | CRS                 | 0     | 3, TC | IIC  | 1 | 1 | 0 | 31 |
| 16 | 83 | 0 | Dizziness                                        | 1-2 | 6.65        | Multiple | 253   | CRS                 | 0     | 0     | IIIC | 0 | 0 | 1 | 7  |
| 17 | 55 | 0 | Dysarthria;<br>Dizziness;<br>Hemiplegia          | 3-4 | 6.65        | Multiple | 254   | IDS                 | 2, TC | 6, TC | IV   | 0 | 1 | 0 | 6  |
| 18 | 59 | 0 | Unknown                                          | 1-2 | Unkno<br>wn | Single   | 27.6  | CRS                 | 0     | 6, TC | IC   | 1 | 1 | 0 | 59 |
| 19 | 74 | 0 | Dysarthria;<br>Hemiplegia                        | 1-2 | 4.80        | Multiple | 304   | LAP                 | 0     | 0     | IIIc | 0 | 0 | 1 | 6  |
| 20 | 59 | 0 | Dizziness;<br>Dysarthria                         | 3-4 | 3.61        | Multiple | 385   | IDS                 | 1, TC | 6, TC | IIIc | 1 | 1 | 1 | 48 |
| 21 | 52 | 0 | Dysarthria;<br>Dizziness;                        | 3-4 | 4.67        | Multiple | 417   | Surgical<br>staging | 0     | 4, TC | IA   | 1 | 1 | 0 | 33 |
| 22 | 50 | 0 | Hemiplegia                                       | 3-4 | 17.69       | Multiple | 447   | IDS                 | 2, TC | 4, TC | IIB  | 1 | 1 | 0 | 5  |
| 23 | 70 | 0 | Unknown                                          | 1-2 | 2.19        | Single   | 598   | BSO                 | 0     | 1, TC | III  | 0 | 0 | 1 | 4  |

|    |    |   |                                         |     |       |          |       |     |                   |                              |      |   |   |   |    |
|----|----|---|-----------------------------------------|-----|-------|----------|-------|-----|-------------------|------------------------------|------|---|---|---|----|
| 24 | 62 | 1 | Dysarthria;<br>Dizziness;               | 3-4 | 15.37 | Multiple | 62    | CRS | 0                 | 0                            | IVB  | 0 | 0 | 1 | 1  |
| 25 | 62 | 0 | Unknown                                 | 1-2 | 1.68  | Single   | 635   | CRS | 0                 | 10, TC                       | IIIC | 0 | 1 | 1 | 39 |
| 26 | 51 | 0 | Dizziness;                              | 1-2 | 0.15  | Single   | 71    | IDS | 1, 5-Fu<br>(IP)   | 6, TC                        | IC   | 1 | 1 | 0 | 49 |
| 27 | 39 | 1 | Dizziness;<br>Dysarthria;<br>Hemiplegia | 3-4 | 2.97  | Multiple | 73    | IDS | 3, TC             | 3, TC                        | III  | 1 | 1 | 0 | 7  |
| 28 | 68 | 0 | Dysarthria                              | 1-2 | 1.71  | Multiple | 83.49 | LAP | 2, TC             | 0                            | IIIC | 0 | 0 | 1 | 14 |
| 29 | 59 | 1 | Dysarthria                              | 3-4 | 0.75  | Multiple | 877   | IDS | 4, 3TC<br>and 1TP | 5, TC                        | IIIC | 1 | 1 | 0 | 40 |
| 30 | 62 | 0 | Dysarthria;<br>vomiting                 | 3-4 | 0.57  | Multiple | 99    | CRS | 0                 | 8, docetaxel+<br>carboplatin | IIIC | 1 | 1 | 1 | 57 |
